# Supplementary material for: C2N-supported single metal ion catalysts for HCOOH dehydrogenation
Source: Royal Society of Chemistry journal article supplement (doi:10.1039/c8ta02299b), 2018-01-01
Supplement: c8ta02299b1.pdf [file c8ta02299b1.pdf]

## Supporting Information

### C<sub>2</sub>N-Supported Single Metal Ion Catalyst for HCOOH

#### Dehydrogenation

Wenhui Zhong,<sup>1</sup> Yuxia Liu,<sup>2</sup> Mingsen Deng,<sup>1</sup> Yachao Zhang,<sup>1</sup> Chuanyi Jia,<sup>1</sup> Oleg V.

Prezhdo,<sup>3</sup> Jianyong Yuan,<sup>4</sup> and Jun Jiang<sup>5,\*</sup>

<sup>1</sup>Guizhou Provincial Key Laboratory of Computational Nano-Material Science, Institute of Applied Physics, Guizhou Synergetic Innovation Center of Scientific Big Data for Advanced Manufacturing Technology, Guizhou Education University, Gaoxin Road 115, Guiyang, Guizhou 550018, P. R. China;

<sup>2</sup>School of Chemistry and Chemical Engineering, Qufu Normal University, Qufu 273165, P.R. China;

<sup>3</sup>Department of Chemistry, Department of Physics, and Department of Astronomy, University of Southern California, Los Angeles, California 90089, United States;

<sup>4</sup>Key Laboratory for Ultrafine Materials of Ministry of Education and Shanghai Key Laboratory of Advanced Polymeric Materials, School of Materials Science and Engineering, East China University of Science and Technology, Shanghai 200237, China;

<sup>5</sup>Hefei National Laboratory for Physical Sciences at the Microscale, iChEM (Collaborative Innovation Center of Chemistry for Energy Materials), CAS Center for Excellence in Nanoscience, School of Chemistry and Materials Science, University of Science and Technology of China, Hefei, Anhui 230026, China

Email: jiangj1@ustc.edu.cn

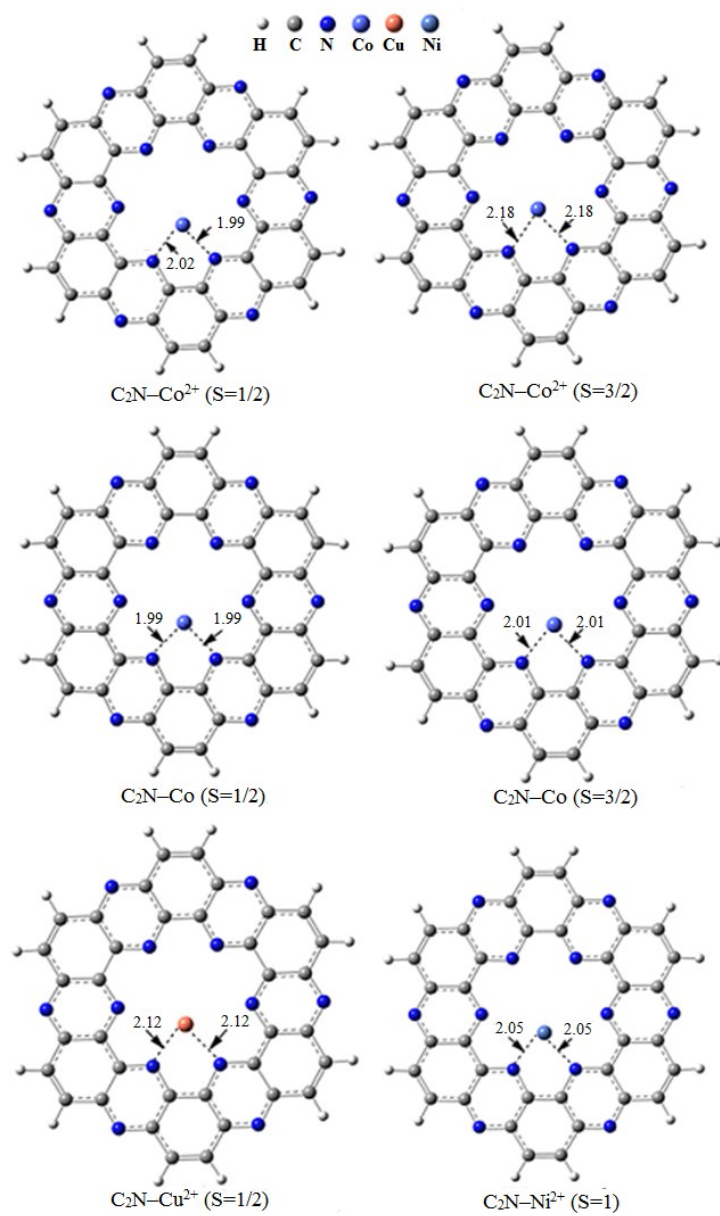

Figure S1. The atomic structures of different  $C_2N-TM^{x+}$  hybrid systems

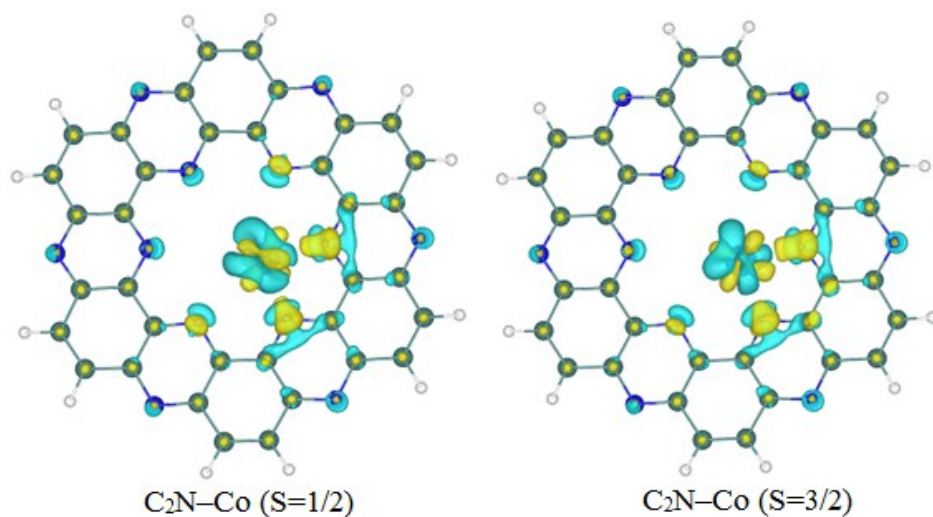

Figure S2. The electron density difference for  $\text{C}_2\text{N-Co (S= 1/2 and 3/2)}$  which reflect charge re-distribution due to the deposition of Co on  $\text{C}_2\text{N}$ . The unit of isosurface values is  $0.006 \text{ e } \text{\AA}^{-3}$ . Yellow bubble represents electron accumulation and cyan bubble denotes electron depletion.

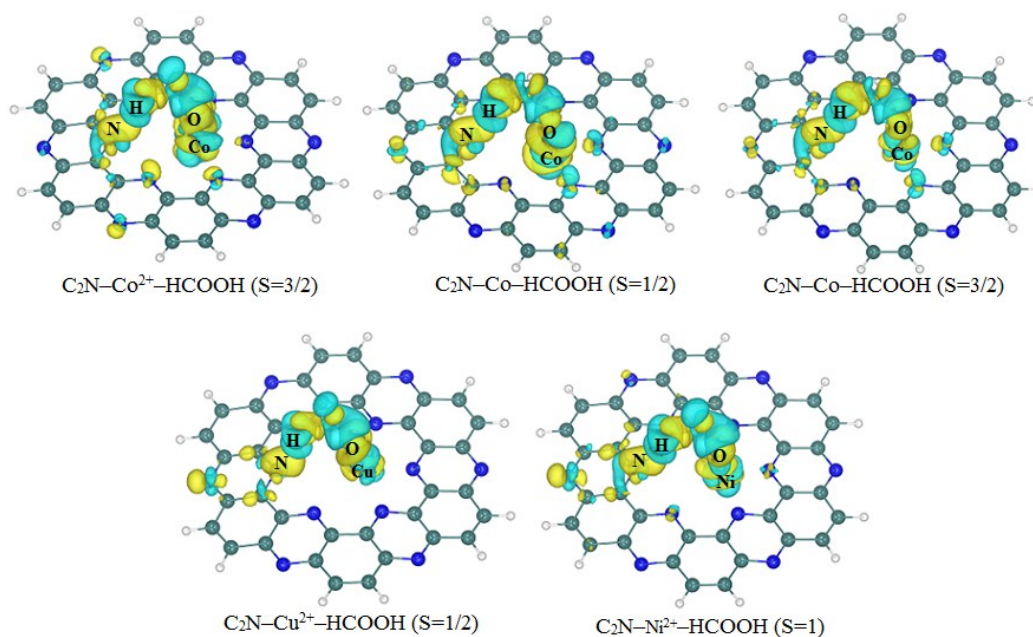

Figure S3. The electron density difference for HCOOH adsorbed on  $\text{C}_2\text{N}-\text{Co}^{2+}$  ( $S=3/2$ ),  $\text{C}_2\text{N}-\text{Co}$  ( $S=1/2$ ),  $\text{C}_2\text{N}-\text{Co}$  ( $S=3/2$ ),  $\text{C}_2\text{N}-\text{Cu}^{2+}$  ( $S=1/2$ ) and  $\text{C}_2\text{N}-\text{Ni}^{2+}$  ( $S=1$ ). The unit of isosurface values is  $0.002 \text{ e } \text{\AA}^{-3}$ . Yellow bubble represents electron accumulation and cyan bubble denotes electron depletion.

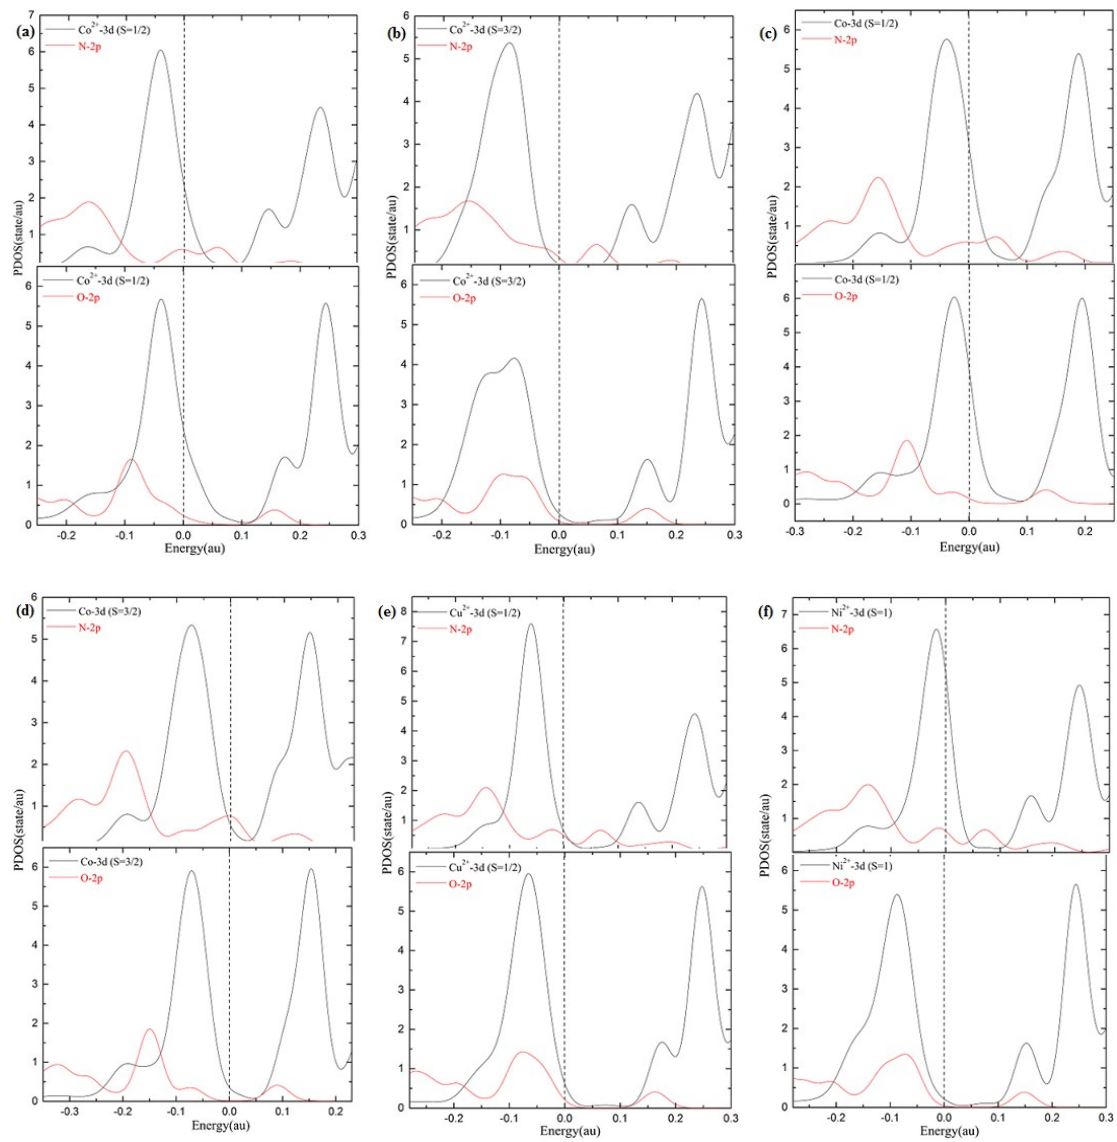

Figure S4. The PDOS of pre and post HCOOH adsorption on  $C_2N-TM^{x+}$ .

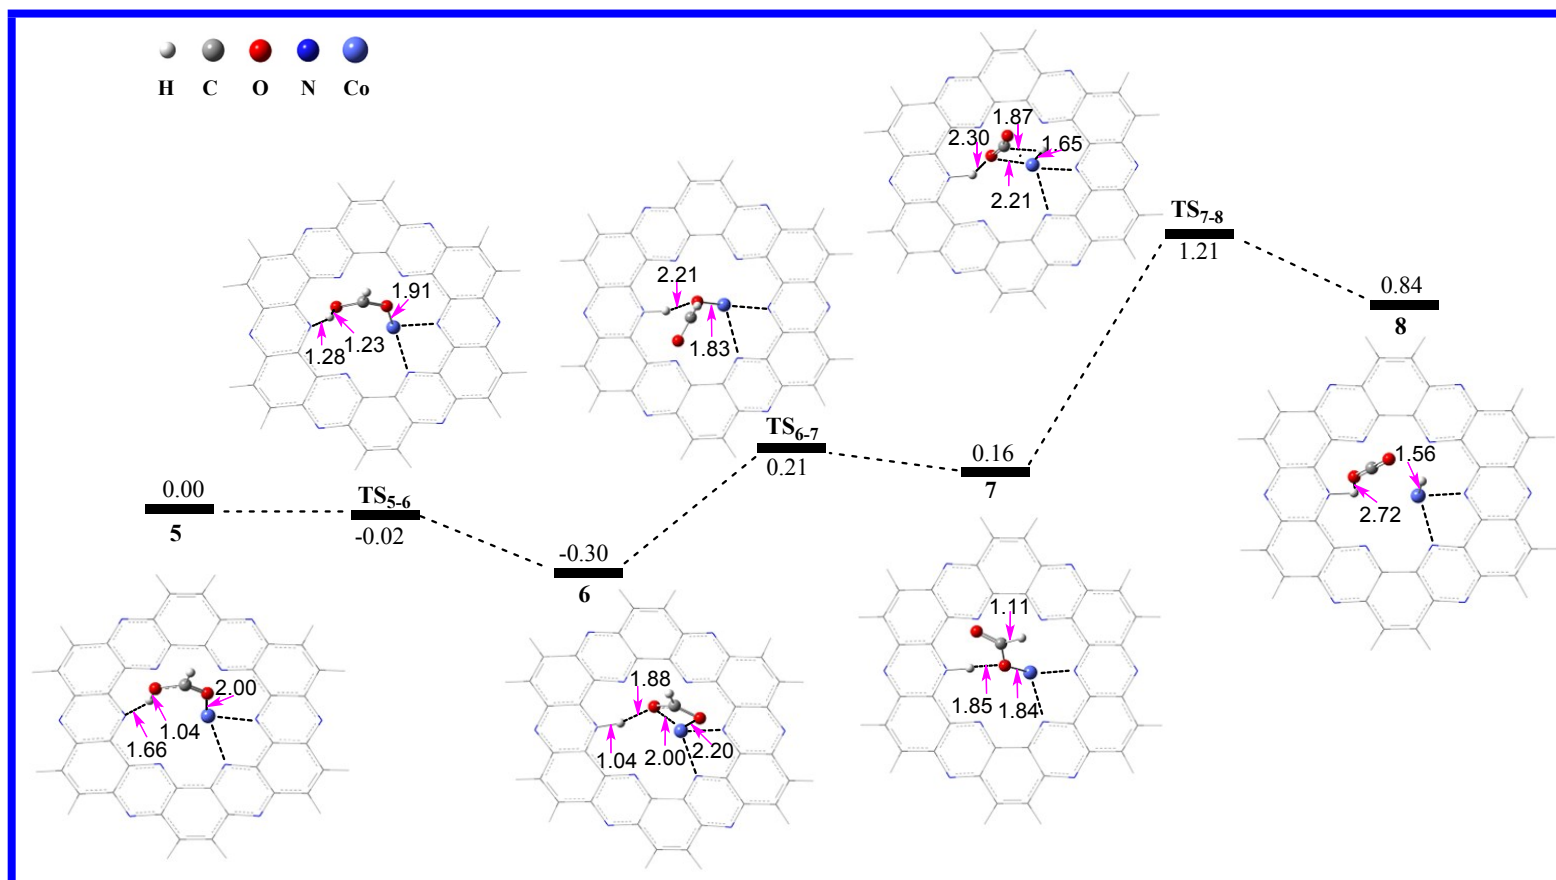

Figure S5. Calculated potential energy profile of the HCOOH dehydrogenation reaction on  $\text{C}_2\text{N-Co}^{2+}$  ( $S=3/2$ ) with the optimized geometries of intermediates and transition states involved in the reaction. The relative free energies are given in eV. The distances are in Å.

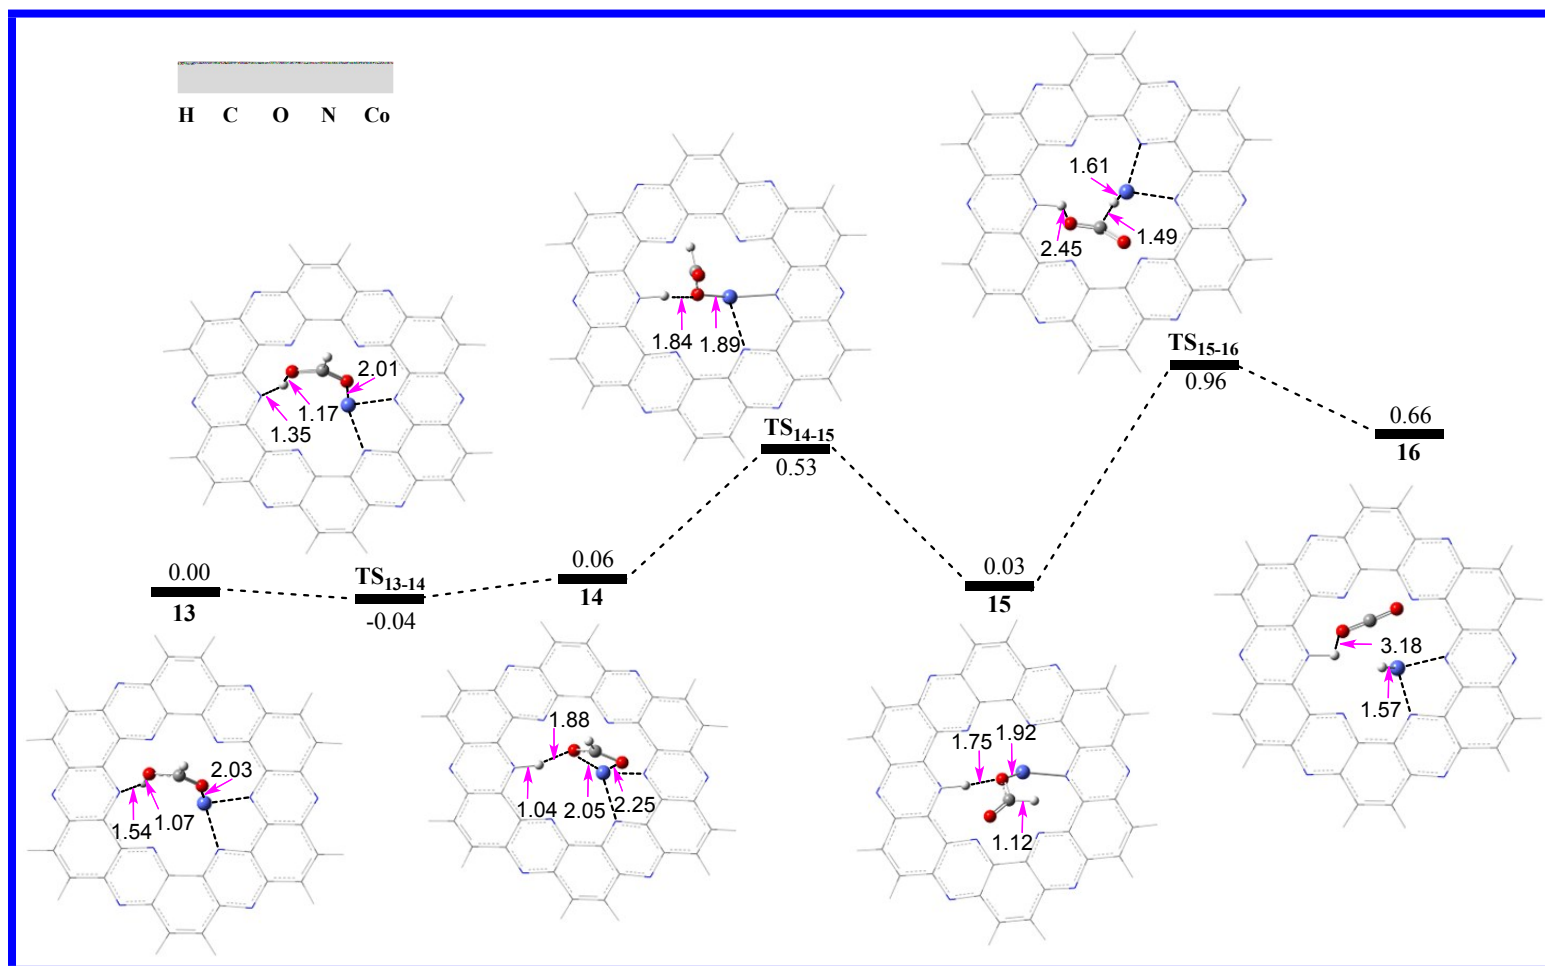

Figure S6. Calculated potential energy profile of the HCOOH dehydrogenation reaction on C<sub>2</sub>N-Co (S=3/2) with the optimized geometries of intermediates and transition states involved in the reaction. The relative free energies are given in eV. The distances are in Å.
